# Supplementary material for: Revisiting Key Entry Routes of Human Epidemic Arboviruses into the Mainland Americas through Large-Scale Phylogenomics
Source: Hindawi journal article supplement (doi:10.1155/2018/6941735), 2018-10-08
Supplement: f1 [file 6941735.f1.zip]

**Table S1: Evolutionary divergence over ZIKV sequence pairs between groups**

|            | <b>I</b> | <b>II</b> | <b>III</b> | <b>IV</b> | <b>V</b> | <b>VI</b> |
|------------|----------|-----------|------------|-----------|----------|-----------|
| <b>I</b>   |          | 0.000     | 0.000      | 0.000     | 0.001    | 0.001     |
| <b>II</b>  | 0.004    |           | 0.000      | 0.000     | 0.000    | 0.000     |
| <b>III</b> | 0.004    | 0.004     |            | 0.000     | 0.000    | 0.000     |
| <b>IV</b>  | 0.004    | 0.004     | 0.004      |           | 0.000    | 0.001     |
| <b>V</b>   | 0.004    | 0.004     | 0.003      | 0.003     |          | 0.000     |
| <b>VI</b>  | 0.004    | 0.004     | 0.004      | 0.004     | 0.003    |           |

The number of base substitutions per site from averaging over all sequence pairs between groups are shown below the diagonal.

Standard error estimate are shown above the diagonal.

Roman algorithms indicate ZIKV variants inferred by this study.

**Table S2: Average of evolutionary divergence over ZIKV sequence pairs within groups**

|            | <b>d</b> | <b>S.E.</b> |
|------------|----------|-------------|
| <b>I</b>   | 0.003    | 0.000       |
| <b>II</b>  | 0.003    | 0.000       |
| <b>III</b> | 0.003    | 0.000       |
| <b>IV</b>  | 0.002    | 0.000       |
| <b>V</b>   | 0.000    | 0.000       |
| <b>VI</b>  | 0.002    | 0.000       |

**d** = Number of base substitutions per site from averaging over all sequence pairs within each group.

**S.E.** = Standard error.

Roman algorithms indicate ZIKV variants inferred by this study.
