# Supplementary figures and images for: Revisiting Key Entry Routes of Human Epidemic Arboviruses into the Mainland Americas through Large-Scale Phylogenomics
Source: Hindawi journal article supplement (doi:10.1155/2018/6941735), 2018-10-08

# Zika outbreak in Americas

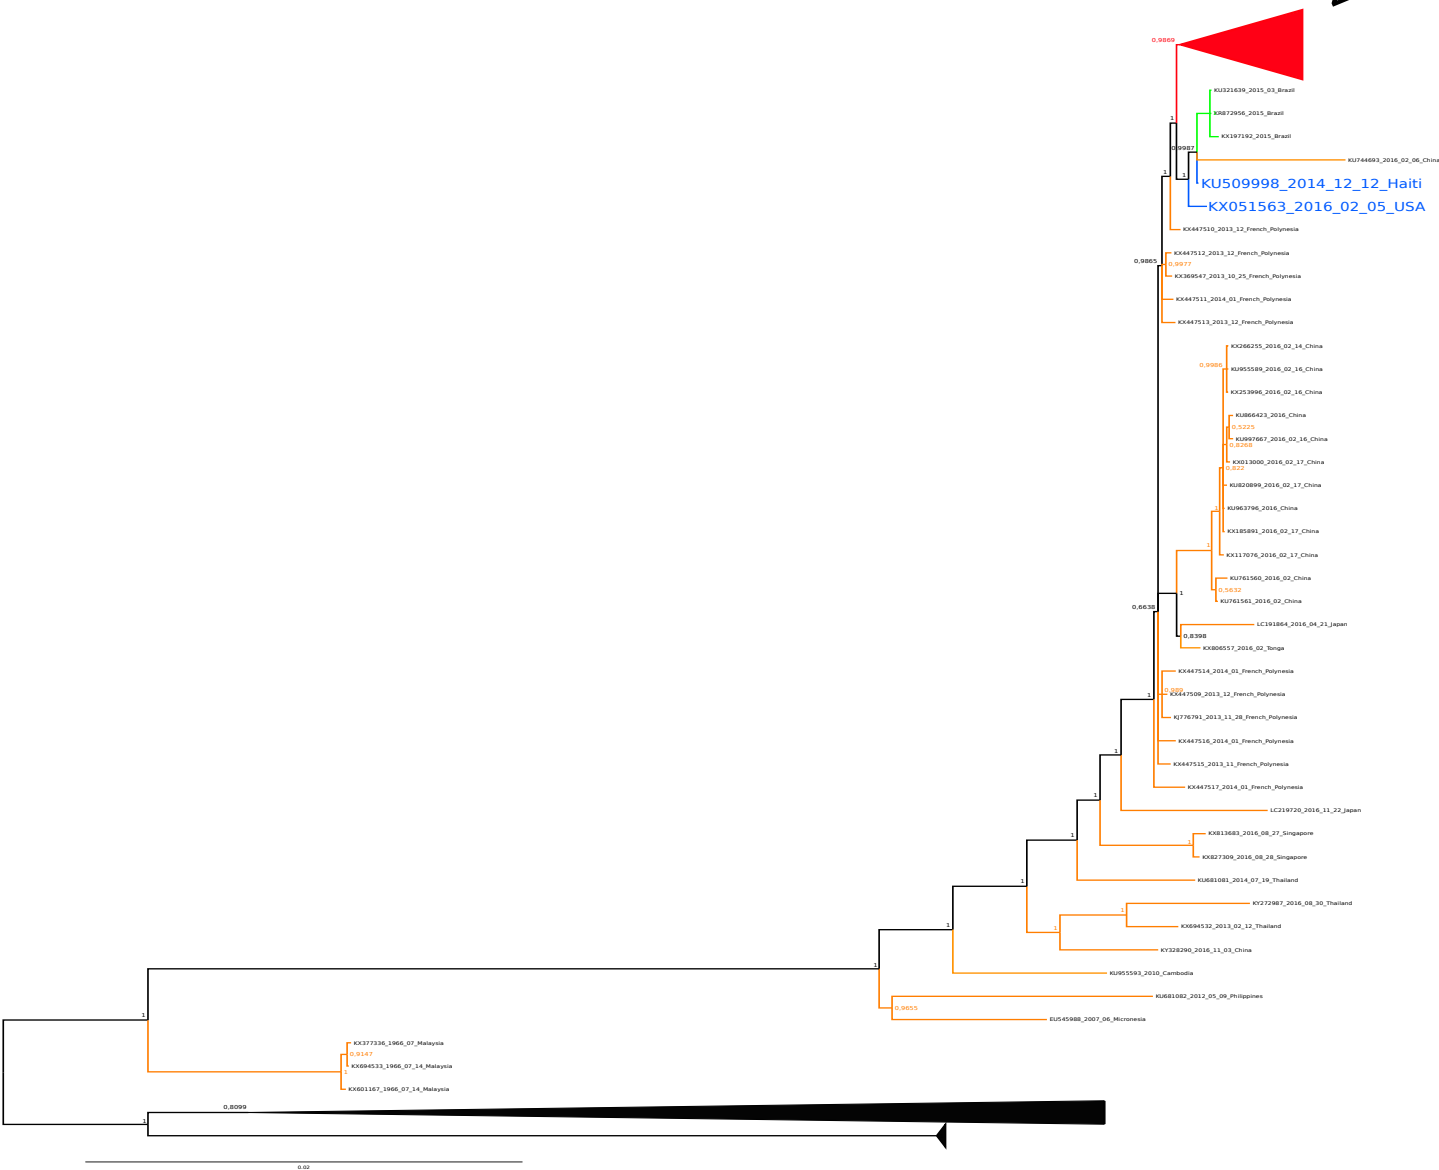

Asian genotype

African genotype

Supplement: f1 [file 6941735.f1.zip]
